# Supplementary material for: Limonoid Triterpene, Obacunone Increases Runt-Related Transcription Factor 2 to Promote Osteoblast Differentiation and Function
Source: PubMed Central journal article supplement (PMC7957678; doi:10.3390/ijms22052483), 2021-03-02
Supplement: ijms-22-02483-s001.pdf [file ijms-22-02483-s001.pdf]

**Supplementary Figure 1. Effects of Obac on cytotoxicity and proliferation in pre-osteoblasts.**

Pre-osteoblasts were incubated with Obac at concentrations of 1, 10, 30, and 100  $\mu\text{M}$  for 24 h, and cell viability was measured by BrdU incorporation assay. Data are representative of three independent experiments, and values are expressed in the mean  $\pm$  S.E.M. \*,  $p < 0.05$  indicates statistically significant difference, compared with the control.

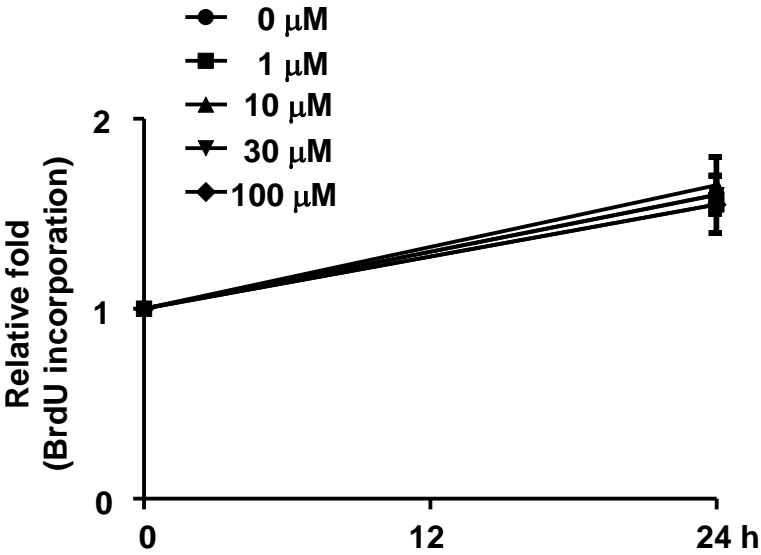

Supplementary Figure 2. Magnified image of Figure 5C

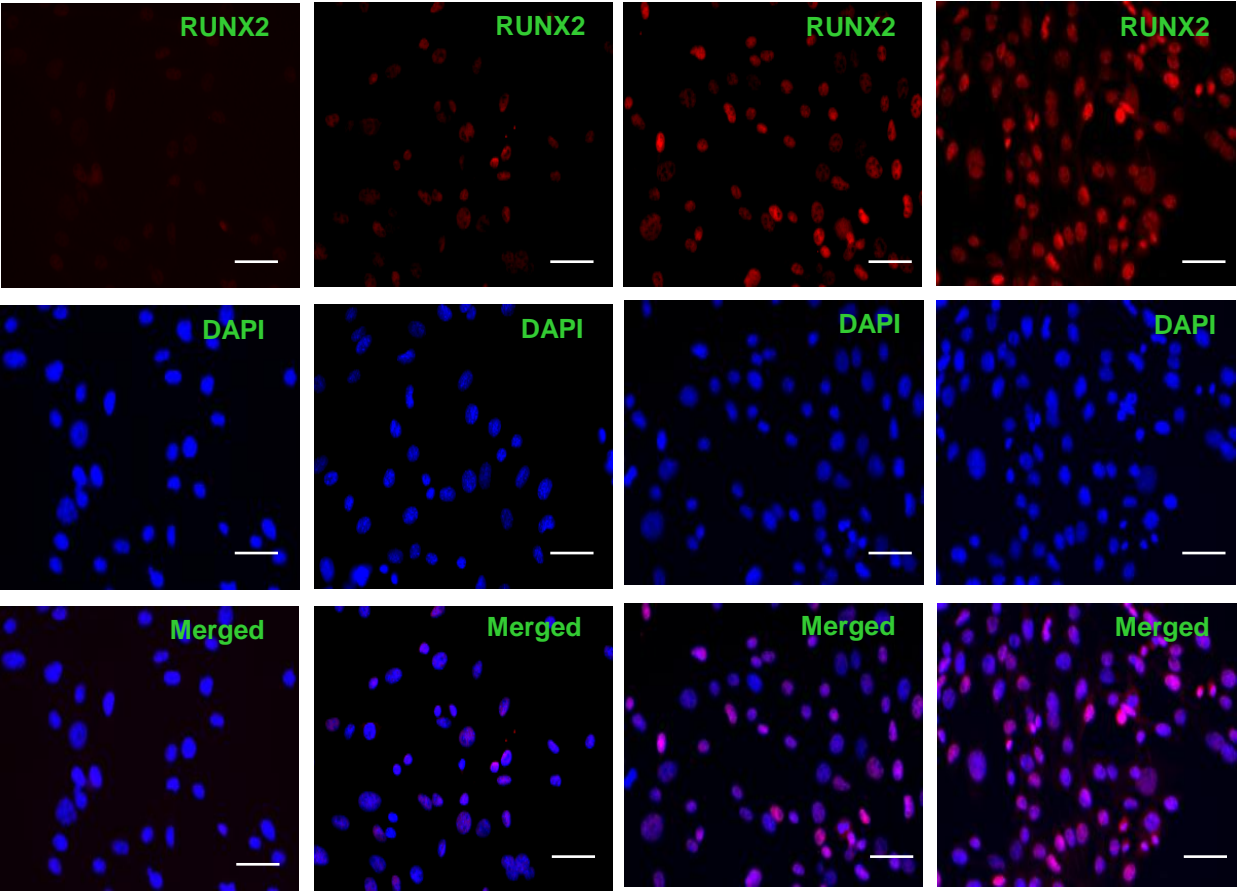

|              |   |   |   |    |            |
|--------------|---|---|---|----|------------|
| <b>OS:</b>   | - | + | + | +  | 50 $\mu$ m |
| <b>Obac:</b> | - | 0 | 1 | 10 | $\mu$ M    |

Supplementary Figure 3. Magnified image of Figure 6E

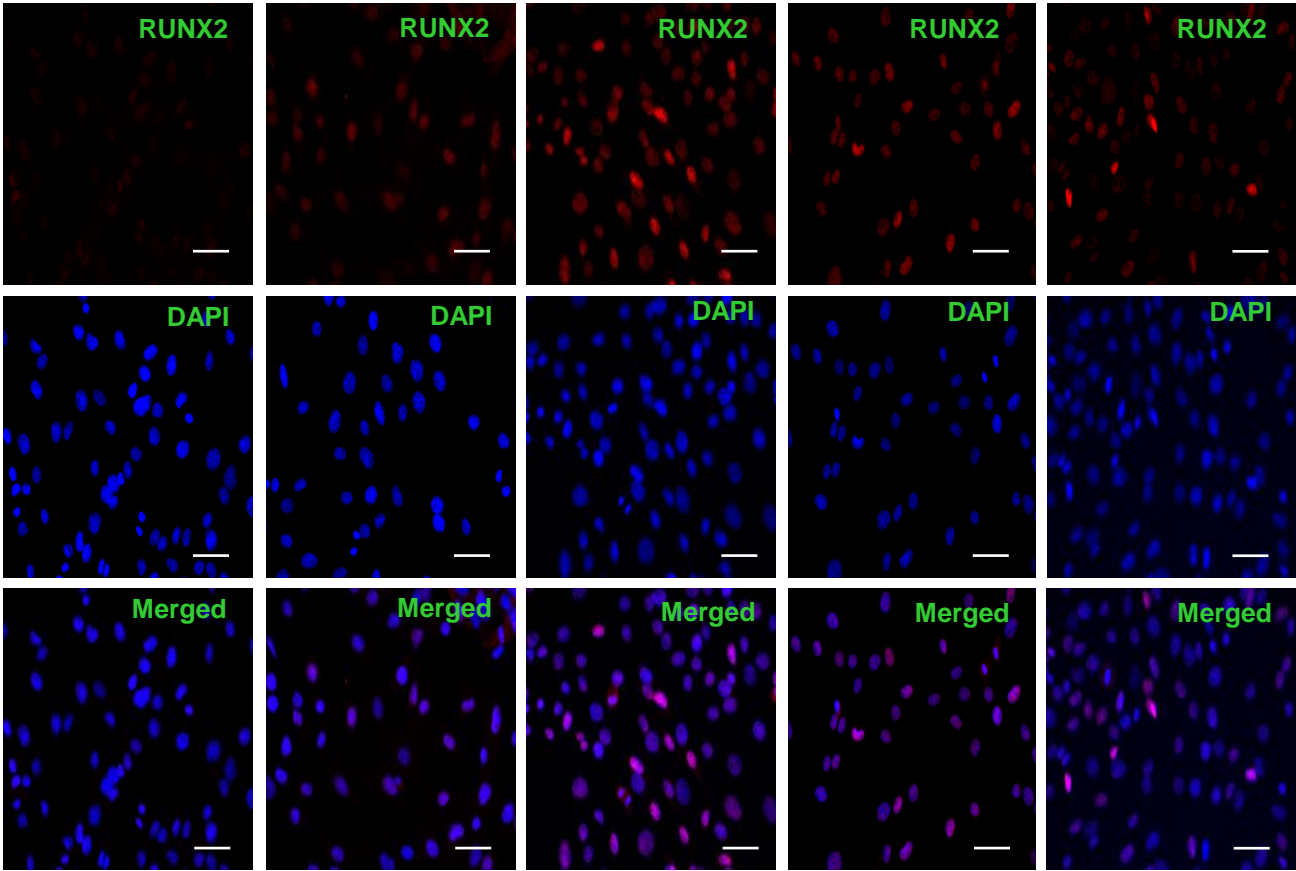

50  $\mu$ m

|                |   |   |   |   |   |
|----------------|---|---|---|---|---|
| <b>OS:</b>     | - | + | + | + | + |
| <b>Obac :</b>  | - | - | + | + | + |
| <b>Noggin:</b> | - | - | - | + | - |
| <b>Dkk-1:</b>  | - | - | - | - | + |
